# Supplementary material
Source: PubMed Central journal article supplement (PMC3740866)
Supplement: 1304250110_pnas.201304250SI.pdf [file 1304250110_pnas.201304250SI.pdf]

# Supporting Information

Richter et al. 10.1073/pnas.1304250110

## SI Materials and Methods

**Immunoblots and ChIP.** Immunoblots were performed as previously described using the SuperSignal Femto West Substrate (Thermo Fisher Scientific) and an LAS-4000 Mini Image Analyzer (FUJIFILM) (1). ChIP and the subsequent quantitative RT-PCR (RT-qPCR) were performed as previously described (2, 3). ChIP was performed with antibodies against K9-acetylated HISTONE3 (H3K9Ac; ab10812; Abcam) with the GFP Vector Fusion Aid Kit (Axorra) for ARF2:GFP and anti-c-Myc agarose (Sigma) for ARF7:MYC. Fold enrichment of each genomic DNA fragment after ChIP and qPCR was calculated by normalizing the amount of target DNA fragment against a genomic fragment of *ACTIN8* as an internal control. Then, the value of the AUXIN RESPONSE FACTOR (ARF) transgenic line input was normalized against the value obtained with the respective loss-of-function mutant as a negative control using the following equation:  $2^{(Ct_{transgene\ input} - Ct_{transgene\ ChIP})} / 2^{(Ct_{mutant} - Ct_{mutant\ ChIP})}$ . DNA enrichments of each fragment were determined by RT-qPCR in three independent biological replicates.

**Microarray Analysis.** Microarray analysis was performed using total RNA extracted from 10-d-old seedlings grown in  $150\ \mu\text{mol m}^{-2}\ \text{s}^{-1}$  white light in long-day conditions (16/8 h at 21 °C/18 °C) using the NucleoSpin RNA Plant Kit (Machery-Nagel). Plant material was collected in the middle of the 16-h light period; 500 ng total RNA were prepared and labeled with Cy3 using the Quick Amp Labeling Protocol (Agilent Technologies). Three biological replicate samples were prepared for each genotype, and *Arabidopsis* arrays (V4, design ID 21169; Agilent Technologies) were hybridized at 65 °C for 17 h in rotating hybridization chambers (Agilent Technologies). Subsequently, the arrays were washed and scanned using an Agilent Microarray Scanner (Agilent Technologies). Total RNA and probe quality were controlled with a Bioanalyzer 2100 (Agilent Technologies). Raw data were extracted using the Feature Extraction software v.10.7.3.1 (Agilent Technologies). Raw data files were imported into GeneSpring GX (v. 12) and normalized choosing the scale-to-median and baseline-to-median options. Data were then filtered using the fold change algorithm (twofold change) and subsequently subjected to an ANOVA analysis ( $P < 0.05$ ) (Dataset S1). Microarray data were deposited in the Gene Expression Omnibus (GSE35730).

1. Richter R, Behringer C, Müller IK, Schwechheimer C (2010) The GATA-type transcription factors GNC and GNL/CGA1 repress gibberellin signaling downstream from DELLA proteins and PHYTOCHROME-INTERACTING FACTORS. *Genes Dev* 24(18):2093–2104.
2. Oh E, et al. (2009) Genome-wide analysis of genes targeted by PHYTOCHROME INTERACTING FACTOR 3-LIKE5 during seed germination in *Arabidopsis*. *Plant Cell* 21(2):403–419.

3. Fode B, Gatz C (2009) Chromatin immunoprecipitation experiments to investigate in vivo binding of *Arabidopsis* transcription factors to target sequences. *Methods Mol Biol* 479:261–272.

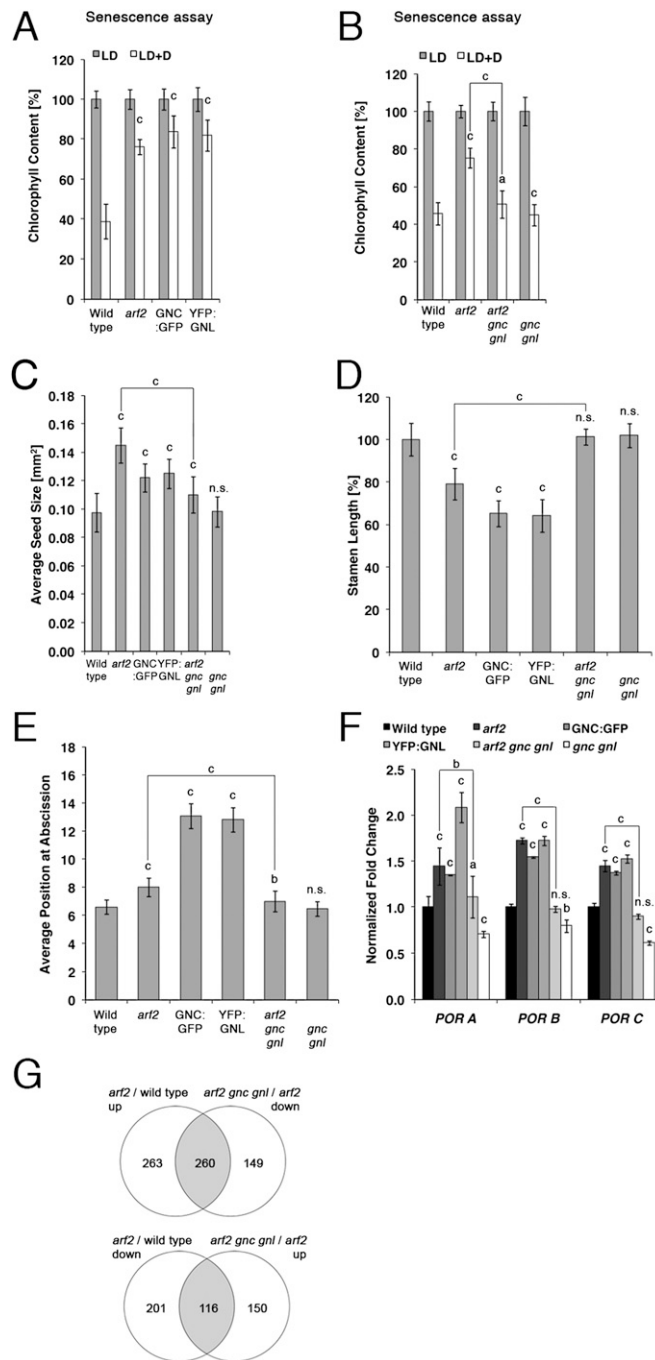

**Fig. S1.** Genetic interaction between *ARF2* and *GATA*, *NITRATE-INDUCIBLE*, *CARBON-METABOLISM INVOLVED* (*GNC*) and *GNC-LIKE* (*GNL*)—analysis of additional phenotypes. (A and B) Relative chlorophyll content of detached leaves before and after transfer to the dark as a quantitative read out for leaf senescence. LD, long day-grown plants; LD+D, long day-grown plants transferred to the dark. (C) Quantification of seed size. (D) Stamen length at floral stage 15. (E) Average position of floral organ abscission. (F) *PROTOCHLOROPHYLLIDE OXIDOREDUCTASE A–C* (*POR A–C*) gene expression as detected by RT-qPCR in 10-d-old seedlings. (G) Venn diagrams indicating the number of differentially expressed up- and down-regulated genes between WT and *arf2* (*arf2*/wild type) as well as *arf2* and *arf2 gnc gnl* (*arf2 gnc gnl/arf2*) as presented in Table S1. The average and SE of three replicate measurements are shown in A–F. Student t test: a =  $P \leq 0.05$ ; b =  $P \leq 0.01$ ; c =  $P \leq 0.001$ ; n.s., not significant.

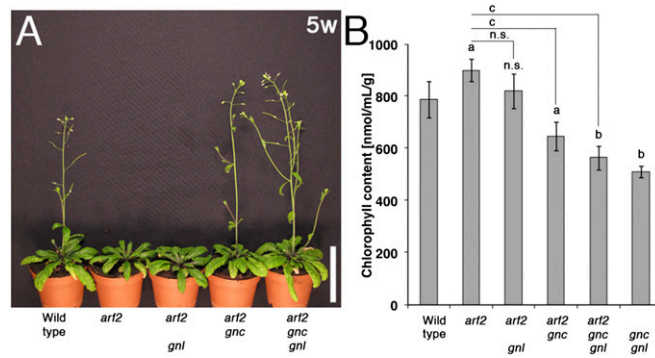

**Fig. 52.** Genetic interaction between *ARF2*, *GNC*, and *GNL*. (A) Representative photographs of 5-wk-old (5w) WT and *arf2* mutant as well as *arf2 gnc*, *arf2 gnl*, and *arf2 gnc gnl* mutant plants grown in long-day conditions. (Scale bar: 5 cm.) (B) Absolute chlorophyll content determined from 10-d-old light-grown seedlings of the genotypes shown in A. Student *t* test: a =  $P \leq 0.1$ ; b =  $P \leq 0.05$ ; c =  $P \leq 0.01$ ; n.s., not significant.

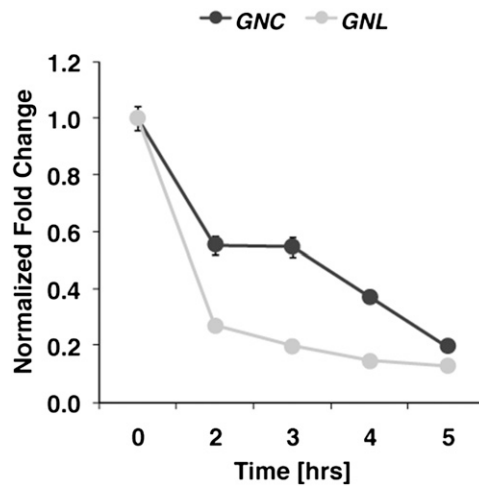

**Fig. 53.** Gene expression analysis of *GNC* and *GNL* after auxin treatment. *GNC* and *GNL* gene expression as detected by RT-qPCR in 10-d-old seedlings after treatment with 5 μM 2,4D. The fold change relative to transcript levels at time point 0 h is shown.

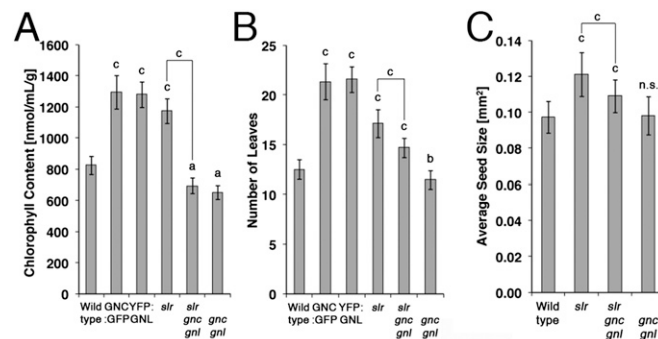

**Fig. 54.** Genetic interaction between *SOLITARY ROOT* (*SLR*) and *GNC* and *GNL*—analysis of additional phenotypes. (A) Absolute chlorophyll content of 10-d-old light-grown seedlings. (B) Flowering time analysis. Number of leaves until bolting. (C) Quantification of seed size. The average and SE of three replicate measurements are shown. Student *t* test: a =  $P \leq 0.05$ ; b =  $P \leq 0.01$ ; c =  $P \leq 0.001$ ; n.s., not significant. CBB, Coomassie Brilliant Blue (loading control).

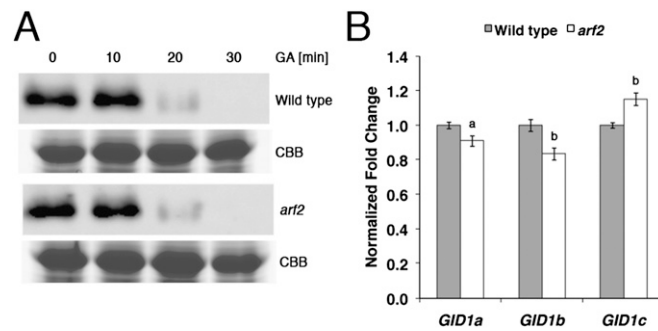

**Fig. 55.** The gibberellin (GA) response pathway is functional in *arf2* mutants. (A) Representative immunoblots with anti-REPRESSOR-OF-*ga1-3* (anti-RGA) of total protein extracts (45  $\mu$ g) prepared from 10-d-old light-grown WT and *arf2* seedlings that had been treated with GA3 (100  $\mu$ M). (B) RT-qPCR detection of *GID1a-GID1c* transcripts from 10-d-old light-grown WT and *arf2* mutant seedlings. Student *t* test: a =  $P < 0.05$ ; b =  $P < 0.01$ .

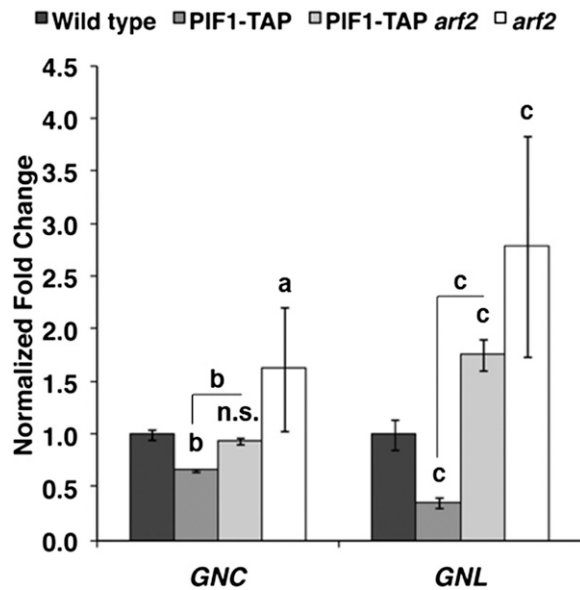

**Fig. 56.** Independent regulation of *GNC* and *GNL* transcription by ARF2 and PHYTOCHROME INTERACTING FACTOR 1 (PIF1). RT-qPCR amplification of *GNC* and *GNL* transcripts from 10-d-old seedlings. Student *t* test: a =  $P < 0.05$ ; b =  $P < 0.01$ ; c =  $P < 0.001$ ; n.s., not significant.

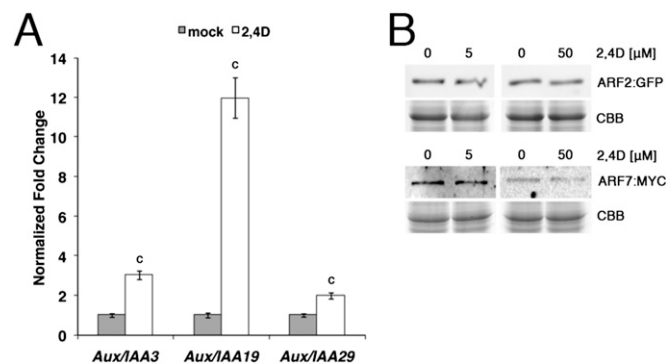

**Fig. 57.** Auxin has no effect on ARF7:MYC and ARF2:GFP protein abundance. (A) RT-qPCR analysis of the transcript analysis of three representative auxin-regulated genes after 30 min 2,4D treatment (5  $\mu$ M) reveals the activation of the auxin response machinery by the auxin treatment. Control experiment for the experiment is shown in B. Fold change relative to mock-treated WT levels. (B) Anti-GFP and anti-MYC immunoblots to detect ARF2:GFP and ARF7:MYC from total protein extracts (30  $\mu$ g) prepared from 30 min mock- and 2,4D-treated seedlings. Student *t* test: c =  $P < 0.001$ . CBB, Coomassie Brilliant Blue (loading control); IAA, indole-3-acetic acid.

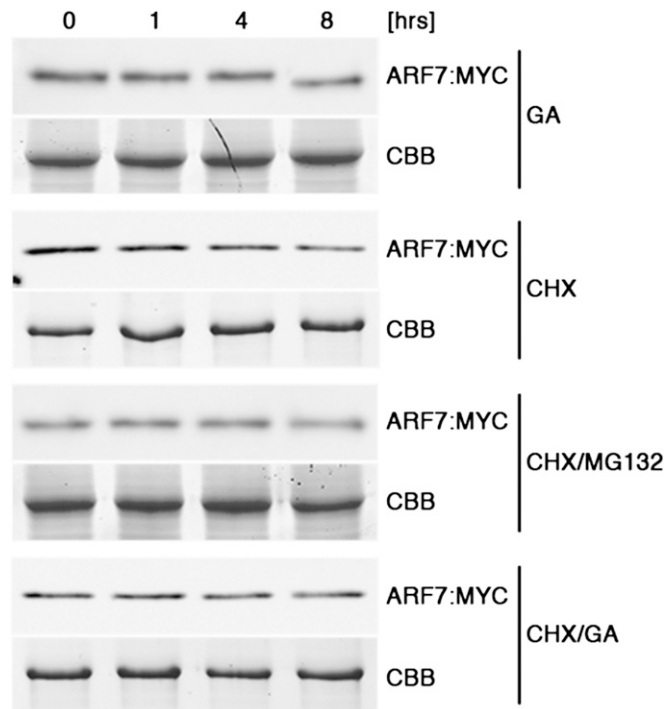

**Fig. S8.** Protein behavior of ARF7:MYC in response to GA. ARF7:MYC immunoblot analyses of 10-d-old light-grown seedlings treated with 10  $\mu$ M GA3, 50  $\mu$ M cycloheximide (CHX), and 100  $\mu$ M MG132 (Z-Leu-Leu-Leu-al) as specified. CBB, Coomassie Brilliant Blue (loading control).

**Table S1.** Positions of auxin response elements in the *GNC*, *GNL*, and *ARF2* promoters

| Name                 | Sequence | Position     | Strand |
|----------------------|----------|--------------|--------|
| <i>GNC</i> promoter  |          |              |        |
| Ia                   | TGT.CTN  | -23 to -19   | +      |
| Ib                   | TGT.CTC  | -135 to -130 | +      |
| IIa                  | TGT.CTC  | -232 to -227 | -      |
| IIb                  | TGT.CTN  | -269 to -265 | +      |
| IIIa                 | TGT.CTC  | -694 to -689 | +      |
| IIIb                 | TGT.CTC  | -777 to -772 | +      |
| <i>GNL</i> promoter  |          |              |        |
| I                    | TGT.CTN  | -492 to -488 | -      |
| IIa                  | TGT.CTN  | -637 to -633 | -      |
| IIb                  | TGT.CTN  | -710 to -706 | +      |
| III                  | TGT.CTC  | -935 to -930 | +      |
| <i>ARF2</i> promoter |          |              |        |
| I                    | TGT.CTN  | -137 to -133 | -      |
| IIa                  | TGT.CTC  | -387 to -382 | -      |
| IIb                  | TGT.CTC  | -401 to -396 | -      |
| IIIa                 | TGT.CTN  | -647 to -643 | +      |
| IIIb                 | TGT.CTN  | -798 to -794 | +      |

**Table S2. List of primers used in this study**

| Primer name            | Sequence (5' to 3')             |
|------------------------|---------------------------------|
| ARF2 gLP               | AGTACTGGCCACCGCATGGCATGCCA      |
| ARF2 gRP               | GCAGCATCATTCAAGTTGTTTCTCTG      |
| GNL gLP                | TATCTGATGGTGGTTCATCATCAAG       |
| GNL gRP                | ATGCTAGATCATCGAAATAGATATTG      |
| GNC gLP                | ACACTTATCACGCTGATCATCTCC        |
| GNC gRP                | TGTGGGAACACTTGTGATAAGCTG        |
| GA1 gLP                | ACATTGTTGCATAGTTTGGAGGGGATGC    |
| GA1 gRP                | TGGAATATGTCCCATTGAGCTGATGCTGAGC |
| UBC21 2step-LP         | TCCTCTTAACTGCGACTCAGG           |
| UBC21 2step-RP         | GCGAGGCGTGTATACATTTG            |
| ACT8 2step-LP          | TCAGCACTTCCAGCAGATG             |
| ACT8 2step-RP          | CTGTGGACAATGCCTGGAC             |
| GNC 2step-LP           | GCGTGATTAGGGTTTGTTCG            |
| GNC 2step-RP           | CTTTGCCGTATACCACATGC            |
| GNL 2step-LP           | CCATATCTCCCAACCTCTCG            |
| GNL 2step-RP           | TGGGCACCATTTGATCAC              |
| GID1a 2step-LP         | GCTGCGAGCGATGAAGTTA             |
| GID1a 2step-RP         | AACCCATGTATTGAGAGGAACC          |
| GID1b 2step-LP         | TTTTGCTGGGTTTTGAGAC             |
| GID1b 2step-RP         | CCATGTGTTGAGTGGGACAA            |
| GID1c 2step-LP         | CTTTTTGCGTTTTGATTGGTAA          |
| GID1c 2step-RP         | CCATGTATTGAGAGGAACCACTG         |
| POR A 2step-LP         | CCCTCAAGCTGCTTCTTG              |
| POR A 2step-RP         | GATGCTGAAGCATTTAATTTTCC         |
| POR B 2step-LP         | CGAGAGCACATTCCTCTCTC            |
| POR B 2step-RP         | GCTTGGATCACTACCACCT             |
| POR C 2step-LP         | GGATTGAATGGGCAAAACAG            |
| POR C 2step-RP         | TGTAAGCCTTTGCTCCATCA            |
| ARF2 2step-LP          | ATGATGCTTGTGGTGACGA             |
| ARF2-2step-RP          | GAAGATTTTGCGAACCATGC            |
| ARF7 2step-LP          | GCTCATATGCATGCTCCACA            |
| ARF7-2step-RP          | GCAATGCATCTCTGCATATTTGT         |
| GNC AuxRE-LP III       | GATTTGTGTGGCTCTCACTCTCC         |
| GNC AuxRE-RP III       | AGAGGTTACGTGAGTCCATGGC          |
| GNC AuxRE-LP II        | TCATTGGTATGACATCCGACTTG         |
| GNC AuxRE-RP II        | TGAGACACGAGCCAAACACATGG         |
| GNC AuxRE-LP I         | ATGAATATAATAGAGACCATGTG         |
| GNC AuxRE-RP I         | TGATGAGATAAACAAATGAAGAC         |
| GNC H3K9 ChIP LP-Ha    | GTGATTCTTCATGAATACAGT           |
| GNC H3K9 ChIP RP-Ha    | GATCCTTTTACTTGTTGTCT            |
| GNC H3K9 ChIP LP-Hb    | CGTCTATGATCTCTCTCAATC           |
| GNC H3K9 ChIP RP-Hb    | GACTTGATGATGATGATGATG           |
| GNL AuxRE-LP III       | ATCATGATATGTGTGGCTCTTG          |
| GNL AuxRE-RP III       | GAGGTTACAGTGAGTACATCTG          |
| GNL AuxRE-LP II        | AGATCTCAGCCGTTGTAGTTCC          |
| GNL AuxRE-RP II        | GGGCAGAGACCAGTGTATATA           |
| GNL AuxRE-LP I         | CTTCATCAGTCTCTAAACATGGCC        |
| GNL AuxRE-RP I         | CTGATTTGGTGAAAGATACATA          |
| GNL H3K9 ChIP LP-Ha    | ACGAAATATTACAGATAGGA            |
| GNL H3K9 ChIP RP-Ha    | ATTGGAACATAACGGCTGAGA           |
| GNL H3K9 ChIP LP-Hb    | CATAGTATAGCTTGGATCC             |
| GNL H3K9 ChIP RP-Hb    | GCTTGGTGATGAAAATGTTGT           |
| ARF2 AuxRE ChIP-LP III | AGGATGACTTAAATTGCTATA           |
| ARF2 AuxRE ChIP-RP III | CTATTACCGGTTGTAACCATTTCC        |
| ARF2 AuxRE ChIP-LP II  | TGAAGCTGAGTTTTGACTACCTCTG       |
| ARF2 AuxRE ChIP-RP II  | CTAGTCTAGGCTTTATCGGAGTC         |
| ARF2 AuxRE ChIP-LP I   | ATCGAGTAATGTCAAGGAGCTA          |
| ARF2 AuxRE ChIP-RP I   | AGCAGACGATATCAACAAGAA           |
| Aux/IAA3 2step-LP      | CAAAGATGGTGATTGGATGCT           |
| Aux/IAA3 2step-RP      | TGATCCTTAGTCTCTTGACACGTA        |
| Aux/IAA19 2step-LP     | CTATGATGATCTAGCCTTTGC           |
| Aux/IAA19 2step-RP     | AGAAACATCCCCAAGGTACA            |
| Aux/IAA29 2step-LP     | CCGAGTCTTCAATAGTTTACGATG        |
| Aux/IAA29 2step-RP     | CGAATATGACGATGATGATACTACC       |

Dataset S1. Differentially expressed genes in WT, *arf2*, and *arf2 gnc gnl* mutants as detected by microarray analysis

[Dataset S1 \(XLS\)](#)
